# Supplementary material
Source: Springer Nature journal article supplement (https://www.springermedizin.de/resource/supplementary/12885_2013_5253_MOESM3_ESM.pdf/9464546)

**UBE2C****Light field****DAPI****Merged****CNE1**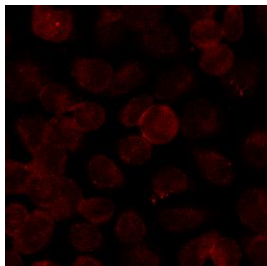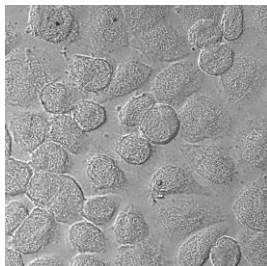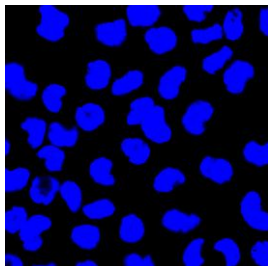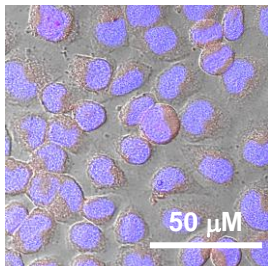**CNE2Z**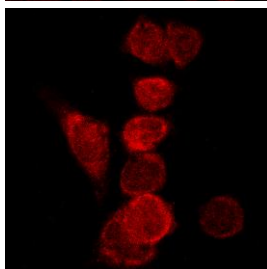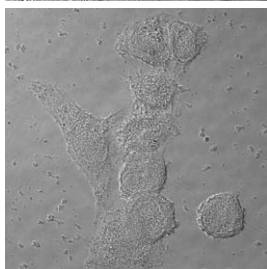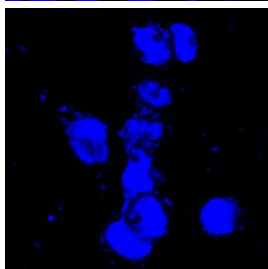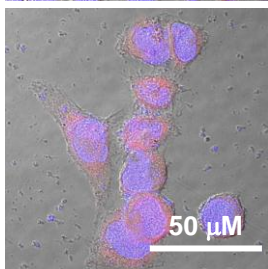**C666-1**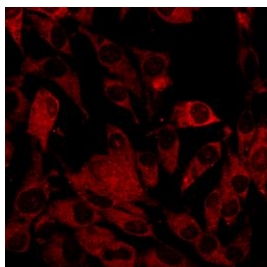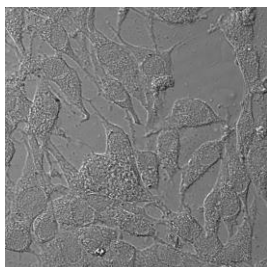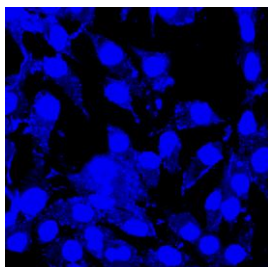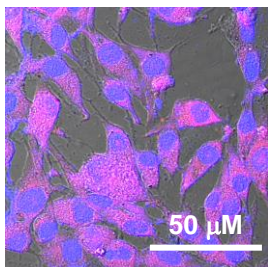**NP-69**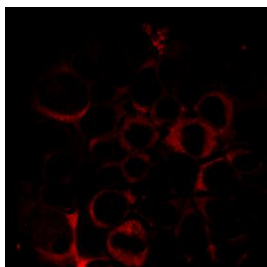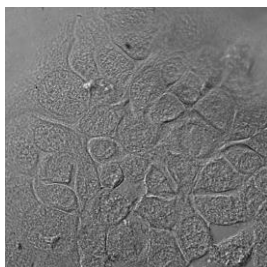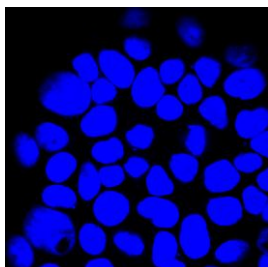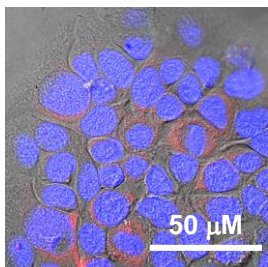

Supplement: MOESM3 [file 9464546]
